# Supplementary material for: A role for Myosin in triggering and executing amnioserosa cell delaminations during dorsal closure
Source: Research Square preprint supplement (doi:10.21203/rs.3.rs-6227955/v1), 2025-03-26
Supplement: Supplementary file 1 [file 8854b2635e730b7dc922a98f.pdf]

Figure 1S

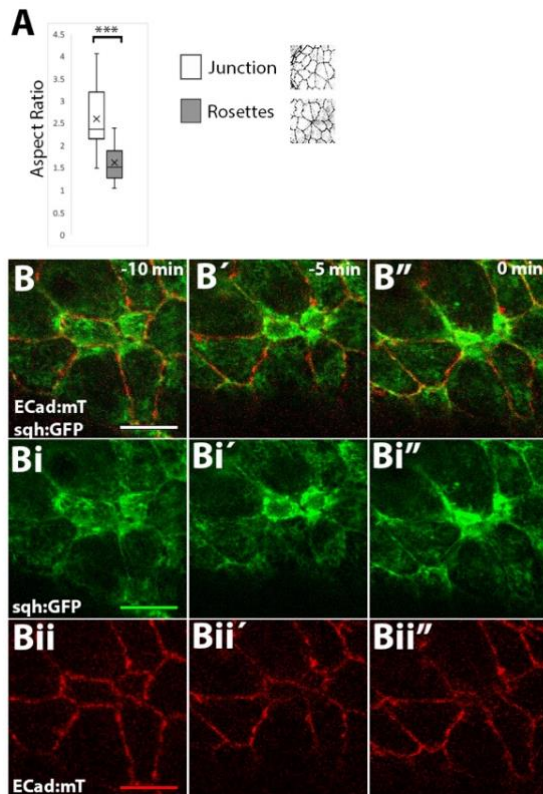

Figure 2S

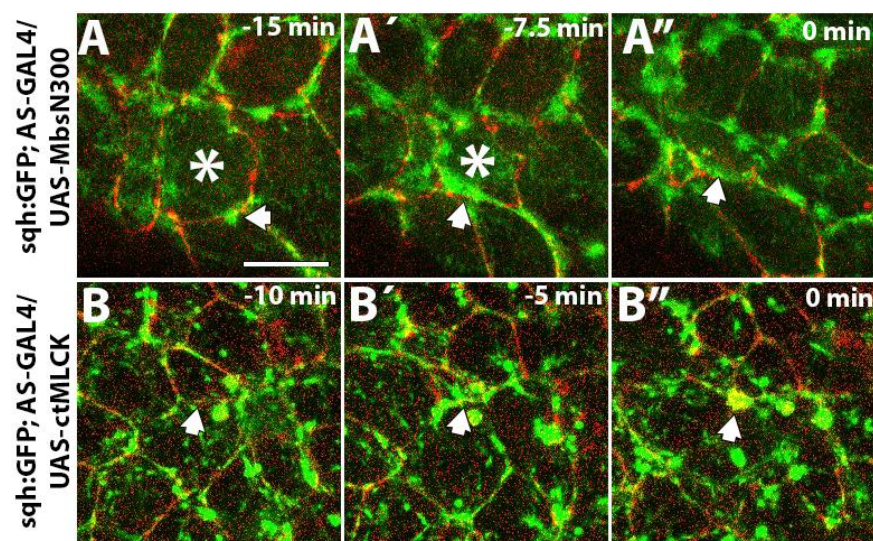

**Figure 3S**

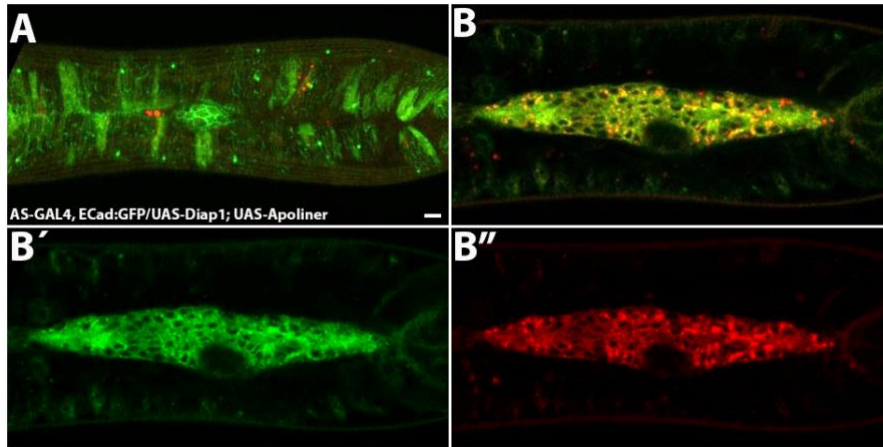

**Supplementary Figure legends:**

Figure 1S. Supplementary figure to Figure 1. (A) The geometry of the delamination process (rosette vs new junction) correlates with cell shape. Aspect ratio (AR) of cells (major\_axis/minor\_axis of the ellipse fit) was measured at the onset of the delamination process. Cells that leave a rosette upon delamination are more isotropic than cells that leave a new junction. (B) Single channels of panels shown in Figure 1I, to enable visualization of ECad decrease at the level of the junctions.

Figure 2S. Supplementary figure to Figure 3. Subcellular localization of Sqh:GFP in delaminating cells (asterisks in A and A', arrow in B) from embryos ectopically expressing MbsN300 (A) and ctMLCK (B). Notice the junctional (A, arrows) and the medial (B', arrow) accumulation of Sqh:GFP in delaminating cells.

Figure 3S. Supplementary figure to Figure 6. The ectopic expression of Diap1 together with the Apoliner sensor prevents activation of the sensor even after the amnioserosa has been internalized. (A) Projection of three apical planes of a late embryo showing almost complete closure. (B) Single basal plane corresponding to the same time point shown in A to show the amnioserosa that has been already internalized. (B', B'') Single channel images to show complete absence of nuclear Apoliner localization.

**Movies:**

Movie 1: Time-lapse movie of an AS-GAL4, ECad:GFP embryo. Time interval is 2 minutes.

Movie 2: Time-lapse movie of a sqh:GFP; ECad:mT embryo. Time interval is 30 seconds.

Movie 3: Time-lapse movie of a ECad:mT, utr:GFP embryo. Time interval is 30 seconds.

Movie 4: Time-lapse movie of an AS-GAL4, ECad:mT; aniRBD:GFP. Time interval is 30 seconds.

Movie 5: Time-lapse movie of an AS-GAL4, ECad:GFP/UAS-MbsN300 embryo. Time interval is 2 minutes.

Movie 6: Time-lapse movie of an AS-GAL4, ECad:GFP/UAS-ctMLCK embryo. Time interval is 2 minutes.

Movie 7: Time-lapse movie of an AS-GAL4, ECad:mT; aniRBD:GFP/UAS-MbsN300 embryo. Time interval is 30 seconds.

Movie 8: Time-lapse movie of an AS-GAL4, ECad:mT; aniRBD:GFP/UAS-ctMLCK embryo. Time interval is 30 seconds.

Movie 9: Time-lapse movie of an ECad.GFP; prd-GAL4/UAS-NLS:mCh embryo. Time interval is 30 seconds.

Movie 10: Time-lapse movie of an ECad.GFP; prd-GAL4/UAS-NLS:mCh; UAS-MbsN300 embryo. Time interval is 2 minutes.

Movie 11: Time-lapse movie of an ECad.GFP; prd-GAL4/UAS-NLS:mCh; UAS-ctMLCK embryo. Time interval is 2 minutes.

Movie 12: Time-lapse movie of an AS-GAL4, ECad:GFP/UAS-Rab5DN embryo. Time interval is 2 minutes.

Movie 13: Time-lapse movie of an ECad:GFP; prd-GAL4/UAS-NLS:mCh; UAS-Rab5DN embryo. Time interval is 2 minutes.

Movie 14: Time-lapse movie of an AS-GAL4, ECad:GFP/UAS-Apoliner embryo. Time interval is 4 minutes.

Movie 15: Time-lapse movie of an AS-GAL4, ECad:mT/UAS-GC3Ai embryo. Time interval is 2 minutes.

Movie 16: Time-lapse movie of an AS-GAL4, ECad:GFP/UAS-Apoliner ; UAS-MbsN300 embryo. Time interval is 2 minutes.

Movie 17: Time-lapse movie of an AS-GAL4, ECad:GFP/UAS-Apoliner; UAS-ctMLCK embryo. Time interval is 2 minutes.

Movie 18. Time-lapse movie of an ECad:GFP; prd-GAL4/UAS-NLS:mCh, UAS-Diap1; UAS-ctMLCK embryo. Time interval is 2 minutes.
